# Supplementary material
Source: PubMed Central journal article supplement (PMC7144133)
Supplement: ao0c00507_si_001.pdf [file ao0c00507_si_001.pdf]

## Supporting Information

### **Adsorption of Phosgene Gas on Pristine and Copper Decorated B<sub>12</sub>N<sub>12</sub> Nanocages: A Comparative DFT Study**

Shahid Hussain,<sup>a</sup> Riaz Hussain,<sup>b</sup> Muhammad Yasir Mehboob,<sup>b</sup> Shahzad Ali Shahid Chatha,<sup>a</sup> Abdullah Ijaz Hussain,<sup>a</sup> Ali Umar,<sup>b</sup> Muhammad Usman Khan,<sup>a,b</sup> Mahmood Ahmed,<sup>c</sup> Muhammad Adnan,<sup>d</sup> Khurshid Ayub<sup>e\*</sup>

- a. Department of Applied Chemistry, Government College University, Faisalabad – 38000, Pakistan*
- b. Department of Chemistry, University of Okara, Okara, 56300, Pakistan*
- c. Renacon Pharma (PVT) Limited, Lahore, 54600, Pakistan*
- d. College of Natural Sciences, Department of Chemistry, Chosun University, Gwangju, 501-759, Republic of Korea*
- e. Department of Chemistry, COMSATS University, Abbottabad campus, Abbottabad 22060, Pakistan*

## Corresponding Author

Khurshid Ayub

Tel: +92-992-383591

Fax: +92-992-383441

E.mail: [Khurshid@cuiatd.edu.pk](mailto:Khurshid@cuiatd.edu.pk)

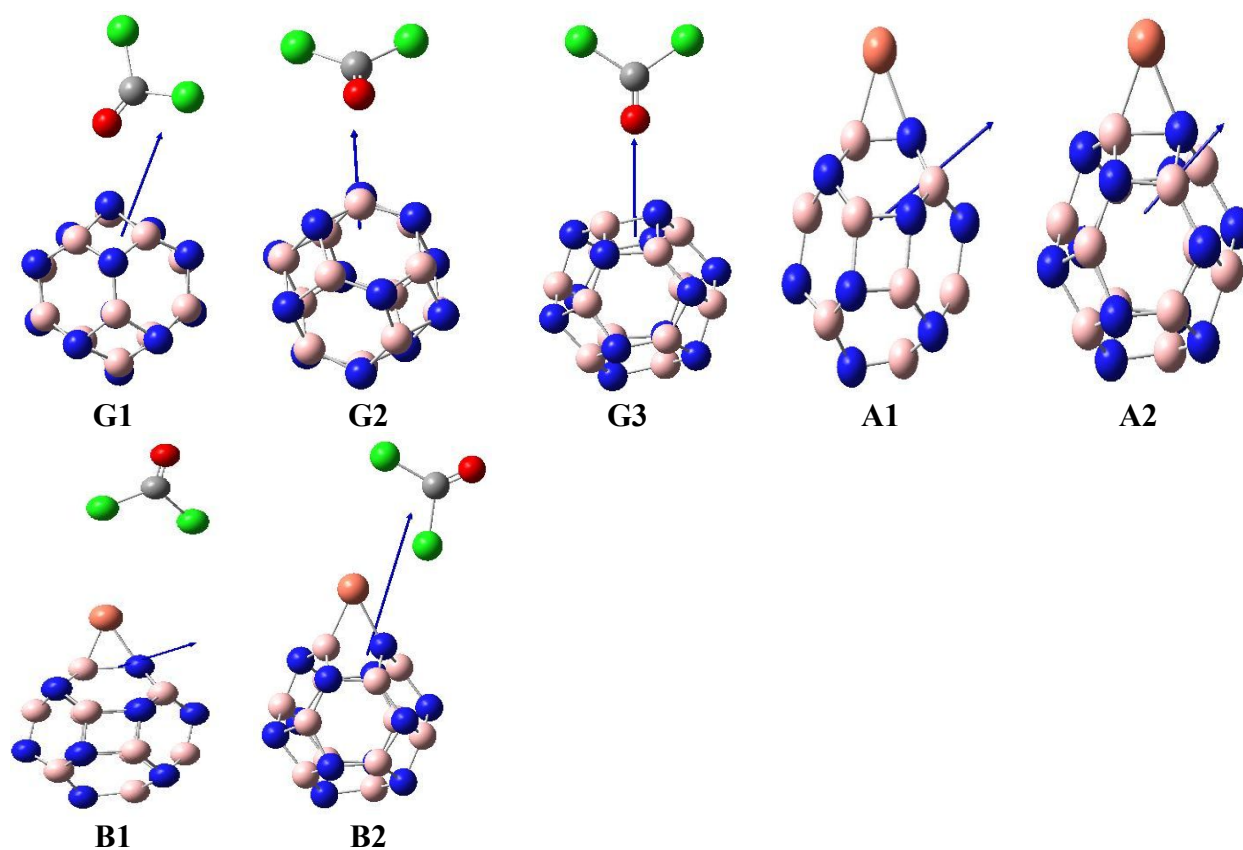

Figure S1. Dipole moment vector representation in all systems

## Optimized Cartesian coordinate of all geometries

### $B_{12}N_{12}$ nanocage

| Symbol | X          | Y           | Z          |
|--------|------------|-------------|------------|
| N      | 0.69093600 | -2.16480000 | 0.78377400 |

|   |             |             |             |
|---|-------------|-------------|-------------|
| N | -0.55934300 | -0.45081400 | 2.29354100  |
| N | 1.89574100  | -0.38117200 | 1.42836800  |
| N | -1.92711100 | 0.89529600  | 1.12466200  |
| N | 0.48228100  | 1.80454600  | 1.51282600  |
| N | -0.69093700 | 2.16483600  | -0.78381900 |
| N | -1.89580500 | 0.38115000  | -1.42835200 |
| N | -1.79706800 | -1.56970200 | 0.29411300  |
| N | 1.92700200  | -0.89523600 | -1.12459400 |
| N | 0.55944500  | 0.45077400  | -2.29353000 |
| N | -0.48230200 | -1.80451300 | -1.51286700 |
| N | 1.79706100  | 1.56971400  | -0.29412500 |
| B | -0.47124900 | -2.13790800 | -0.06456600 |
| B | -1.66677300 | -0.55662600 | 1.30785600  |
| B | -1.63992700 | -0.98734000 | -1.06450600 |
| B | 0.63663200  | -0.96811800 | -1.85819500 |
| B | -1.75981400 | 1.27947300  | -0.25195300 |
| B | -0.63615800 | 1.07840800  | -1.79651100 |
| B | 0.47124200  | 2.13790300  | 0.06450900  |
| B | 1.66683500  | 0.55666400  | -1.30788000 |
| B | -0.63662800 | 0.96810700  | 1.85811600  |
| B | 1.63990100  | 0.98735400  | 1.06451600  |
| B | 1.75985500  | -1.27953200 | 0.25204300  |
| B | 0.63622400  | -1.07849600 | 1.79657600  |

**G1**

| <b>Symbol</b> | <b>X</b>    | <b>Y</b>    | <b>Z</b>    |
|---------------|-------------|-------------|-------------|
| N             | 3.46509900  | 0.18284800  | -1.39123500 |
| N             | 1.29171900  | -1.03405000 | -2.15219700 |
| N             | 3.05084500  | -1.78187300 | -0.38245200 |
| N             | -0.55776900 | -0.16458700 | -1.21718000 |
| N             | 0.51291100  | -2.16337700 | 0.06239100  |
| N             | -0.44887700 | -0.13698000 | 1.38513500  |
| N             | -0.03474000 | 1.82589600  | 0.37609700  |
| N             | 1.29619300  | 1.55240000  | -1.84489300 |
| N             | 3.57611200  | 0.21035500  | 1.21073900  |
| N             | 1.72616500  | 1.07915200  | 2.14485300  |
| N             | 2.50305300  | 2.20982800  | -0.06791000 |
| N             | 1.72036600  | -1.50630600 | 1.83951100  |
| B             | 2.66057200  | 1.37247300  | -1.28536900 |
| B             | 0.62738400  | 0.28629100  | -1.98741900 |
| B             | 1.07824800  | 2.11318400  | -0.48526100 |
| B             | 2.74276400  | 1.43848300  | 1.12278100  |
| B             | -0.65303800 | 0.50900200  | 0.05689800  |
| B             | 0.40399800  | 1.06403200  | 1.57136100  |
| B             | 0.35482600  | -1.32288700 | 1.27904400  |
| B             | 2.38885700  | -0.24027500 | 1.98355400  |
| B             | 0.27414600  | -1.38940400 | -1.12784400 |
| B             | 1.93543800  | -2.06842900 | 0.48111500  |
| B             | 3.64448800  | -0.45711900 | -0.06223000 |
| B             | 2.61223000  | -1.01996000 | -1.58147900 |

|    |             |             |             |
|----|-------------|-------------|-------------|
| C  | -4.13778600 | 0.23848800  | 0.04072400  |
| Cl | -5.81479500 | 0.76168500  | -0.05543000 |
| Cl | -3.97476800 | -1.50944200 | 0.01105900  |
| O  | -3.22597800 | 0.99260600  | 0.11802600  |

## **G2**

| <b>Symbol</b> | <b>X</b>    | <b>Y</b>    | <b>Z</b>    |
|---------------|-------------|-------------|-------------|
| N             | -3.13552900 | 1.42608300  | -1.02767200 |
| N             | -2.09452100 | 1.90664500  | 1.31077600  |
| N             | -3.80113800 | 0.06127300  | 0.62834200  |
| N             | 0.00067200  | 1.11764600  | 1.50210300  |
| N             | -1.88329500 | -0.49280400 | 2.30048800  |
| N             | 0.16155700  | -1.42830100 | 0.98925200  |
| N             | 0.83049700  | -0.06509900 | -0.66633600 |
| N             | -0.62436100 | 2.08855500  | -0.83145700 |
| N             | -2.97473100 | -1.12253400 | -1.53977100 |
| N             | -0.87907400 | -1.91035500 | -1.34773500 |
| N             | -1.08992000 | 0.48807800  | -2.33817300 |
| N             | -2.34865400 | -2.09390100 | 0.79433000  |
| B             | -1.79879400 | 1.52989700  | -1.55018800 |
| B             | -0.79396700 | 1.98241300  | 0.59440800  |
| B             | -0.00839300 | 0.85530500  | -1.38647400 |
| B             | -1.61021600 | -0.82125800 | -2.04572400 |
| B             | 0.55955500  | -0.00839500 | 0.79966200  |
| B             | 0.14830700  | -1.37478200 | -0.49334000 |

|    |             |             |             |
|----|-------------|-------------|-------------|
| B  | -1.17335500 | -1.53370000 | 1.51289600  |
| B  | -2.17862400 | -1.98836600 | -0.63051000 |
| B  | -1.36220700 | 0.81655900  | 2.00843300  |
| B  | -2.96490400 | -0.86078900 | 1.35056800  |
| B  | -3.52133500 | 0.00434200  | -0.83030200 |
| B  | -3.12232700 | 1.37265900  | 0.45792700  |
| C  | 4.13239400  | -0.00759200 | 0.42989600  |
| Cl | 4.82529600  | -1.44173700 | -0.32166000 |
| Cl | 4.72326300  | 1.48212900  | -0.29870200 |
| O  | 3.36011300  | -0.04219400 | 1.32637100  |

### **G3**

| <b>Symbol</b> | <b>X</b>    | <b>Y</b>    | <b>Z</b>    |
|---------------|-------------|-------------|-------------|
| N             | 1.36350300  | 1.47776600  | 1.86545300  |
| N             | -0.16250700 | -0.58685700 | 1.43483200  |
| N             | -0.05643000 | 1.66738700  | 0.13508700  |
| N             | 0.90648300  | -2.25047200 | 0.37039800  |
| N             | -0.36069900 | -0.57048500 | -1.16259400 |
| N             | 1.97203100  | -1.47929000 | -1.87764900 |
| N             | 3.39275000  | -1.66928500 | -0.14748300 |
| N             | 2.32747500  | -0.92985300 | 2.11019500  |
| N             | 2.42830200  | 2.24843400  | -0.38343400 |
| N             | 3.50038900  | 0.58508400  | -1.44755700 |
| N             | 3.69766000  | 0.56913900  | 1.14942900  |
| N             | 1.00852400  | 0.92885200  | -2.12319800 |

|    |             |             |             |
|----|-------------|-------------|-------------|
| B  | 2.45344400  | 0.54359900  | 1.96307800  |
| B  | 1.07472200  | -1.39421200 | 1.57361400  |
| B  | 3.37142700  | -0.87795400 | 1.05452800  |
| B  | 3.47586700  | 1.23062300  | -0.10907400 |
| B  | 2.02049000  | -2.09824400 | -0.52695000 |
| B  | 3.19291400  | -0.81772200 | -1.34909200 |
| B  | 0.88174100  | -0.54451800 | -1.97470100 |
| B  | 2.26044500  | 1.39328400  | -1.58725800 |
| B  | -0.14491400 | -1.23215200 | 0.09734700  |
| B  | -0.03782500 | 0.87624500  | -1.06654200 |
| B  | 1.31362100  | 2.09583000  | 0.51471500  |
| B  | 0.13991200  | 0.81598400  | 1.33700600  |
| C  | -4.51196900 | -0.00646300 | 0.11404900  |
| Cl | -5.50386700 | -1.45294800 | -0.07506700 |
| Cl | -5.45162500 | 1.47485100  | -0.07214100 |
| O  | -3.35205100 | -0.02754000 | 0.34006700  |

## A1

| <b>Symbol</b> | <b>X</b>    | <b>Y</b>    | <b>Z</b>    |
|---------------|-------------|-------------|-------------|
| N             | 0.07825700  | 0.79528100  | -2.13010800 |
| N             | -2.26163000 | 1.40504900  | -1.15057300 |
| N             | -1.43178300 | -0.86726600 | -2.10476400 |
| N             | -2.26311600 | 1.44498800  | 1.09822500  |
| N             | -2.94738600 | -0.82208500 | 0.01358100  |
| N             | -1.43347000 | -0.79156400 | 2.13372900  |

|    |             |             |             |
|----|-------------|-------------|-------------|
| N  | 0.07613800  | 0.87100500  | 2.10133700  |
| N  | -0.09651200 | 2.31905900  | -0.04114600 |
| N  | 0.89256700  | -1.45252100 | -1.09811100 |
| N  | 0.89171800  | -1.41237900 | 1.14946200  |
| N  | 1.61152300  | 0.86545800  | -0.01437800 |
| N  | -1.27907500 | -2.32910300 | 0.04145100  |
| B  | 0.63830200  | 1.45213800  | -0.98949400 |
| B  | -1.50886300 | 2.02750900  | -0.03641000 |
| B  | 0.63693900  | 1.48733500  | 0.93833500  |
| B  | 1.56512700  | -0.68256300 | 0.01288100  |
| B  | -1.39360500 | 0.67707900  | 1.95248900  |
| B  | 0.03652600  | -0.61407500 | 1.96282900  |
| B  | -2.00475900 | -1.44211400 | 0.98389000  |
| B  | 0.13201900  | -2.02054000 | 0.03590800  |
| B  | -2.79275600 | 0.60575700  | -0.01178300 |
| B  | -2.00406500 | -1.47686200 | -0.93272600 |
| B  | 0.03822300  | -0.68433400 | -1.94032500 |
| B  | -1.39109400 | 0.60663400  | -1.97494600 |
| Cu | 3.35791000  | 0.00478400  | 0.00020100  |

## A2

| Symbol | X           | Y           | Z          |
|--------|-------------|-------------|------------|
| N      | -1.61854300 | 0.89848100  | 0.09177700 |
| N      | 0.22371200  | 1.47774400  | 1.82203100 |
| N      | -0.99131100 | -0.78841100 | 1.51422900 |



|    |             |             |             |
|----|-------------|-------------|-------------|
| N  | 2.30758000  | 1.47602700  | 0.97923800  |
| N  | 1.54446600  | -0.73920700 | 2.11689300  |
| N  | 2.93985200  | -0.81578100 | -0.08154700 |
| N  | 2.35158100  | 0.79386600  | -1.53553100 |
| N  | 0.44129000  | 2.31112700  | -0.63096600 |
| N  | -0.94065200 | -1.49301200 | -0.97499600 |
| N  | 1.13345800  | -1.48519700 | -1.83337800 |
| N  | -0.19709900 | 0.73775400  | -2.10004400 |
| N  | 0.92743300  | -2.30601200 | 0.63139600  |
| B  | -0.72219900 | 1.43574800  | -0.90474600 |
| B  | 0.97506700  | 2.05752600  | 0.68047500  |
| B  | 1.05291600  | 1.39997400  | -1.63330800 |
| B  | -0.12447400 | -0.69049600 | -1.90201900 |
| B  | 2.76725900  | 0.65831000  | -0.11318700 |
| B  | 2.23491000  | -0.68140800 | -1.38437100 |
| B  | 2.08333800  | -1.41661500 | 0.90897200  |
| B  | 0.39098700  | -2.05883900 | -0.68052000 |
| B  | 1.47490200  | 0.68102900  | 1.92063900  |
| B  | 0.30295800  | -1.39797500 | 1.62562300  |
| B  | -1.56639300 | -0.76560600 | 0.12036500  |
| B  | -0.87588200 | 0.66792300  | 1.36649400  |
| Cu | -3.33859700 | 0.00277500  | -0.00054500 |

## **B1**

| <b>Symbol</b> | <b>X</b> | <b>Y</b> | <b>Z</b> |
|---------------|----------|----------|----------|
|---------------|----------|----------|----------|

|    |             |             |             |
|----|-------------|-------------|-------------|
| N  | 1.17735500  | -0.07092300 | 2.17389600  |
| N  | 3.51332100  | 1.05864200  | 1.89323700  |
| N  | 2.90392700  | -1.46941000 | 1.84564400  |
| N  | 3.80849200  | 1.91153600  | -0.16667600 |
| N  | 4.66645000  | -0.52417400 | 0.17552700  |
| N  | 3.46103900  | 0.13841400  | -2.03707700 |
| N  | 1.73332500  | 1.53408400  | -1.70300900 |
| N  | 1.40508400  | 2.11507600  | 0.80119000  |
| N  | 0.84591400  | -1.85439900 | 0.30477600  |
| N  | 1.14181100  | -1.00219400 | -1.75418900 |
| N  | -0.05501600 | 0.62566200  | -0.02449200 |
| N  | 3.25475900  | -2.06016500 | -0.66288500 |
| B  | 0.68424500  | 0.90242500  | 1.24823700  |
| B  | 2.83254700  | 1.97310000  | 0.94688400  |
| B  | 0.93874600  | 1.63249100  | -0.51766800 |
| B  | 0.22000800  | -0.79768500 | -0.57440000 |
| B  | 3.18244200  | 1.43170100  | -1.37292400 |
| B  | 1.97167700  | 0.10919900  | -2.07797100 |
| B  | 3.96293300  | -0.83161300 | -1.09892000 |
| B  | 1.82552000  | -1.90179100 | -0.80206100 |
| B  | 4.30179500  | 0.77723800  | 0.66175100  |
| B  | 3.71023600  | -1.55828600 | 0.65650000  |
| B  | 1.45846800  | -1.37102700 | 1.49666700  |
| B  | 2.66614200  | -0.05853100 | 2.22566400  |
| Cu | -1.63657600 | -0.33025000 | -0.65493700 |

|    |             |             |            |
|----|-------------|-------------|------------|
| C  | -6.46450400 | 0.16185600  | 0.18618000 |
| O  | -7.63658600 | 0.30070700  | 0.17768400 |
| Cl | -5.65031000 | -1.39324000 | 0.36709900 |
| Cl | -5.31607700 | 1.50202400  | 0.01962000 |

## **B2**

| <b>Symbol</b> | <b>X</b>    | <b>Y</b>    | <b>Z</b>    |
|---------------|-------------|-------------|-------------|
| N             | -0.38298800 | -0.35685000 | -0.29163200 |
| N             | 1.40274500  | -1.23136300 | -1.95381400 |
| N             | 0.76103900  | 1.23420700  | -1.50077200 |
| N             | 3.35017300  | -1.82498900 | -0.99858900 |
| N             | 3.24693800  | 0.59533800  | -1.95745800 |
| N             | 4.43744500  | 0.14340700  | 0.31483000  |
| N             | 3.35596700  | -1.37581000 | 1.56931200  |
| N             | 1.21163300  | -2.28758300 | 0.41208700  |
| N             | 0.78489800  | 1.70592900  | 1.04276300  |
| N             | 2.71803100  | 1.10643700  | 2.01718400  |
| N             | 0.86191700  | -0.72243400 | 1.98382500  |
| N             | 2.91728300  | 2.14545600  | -0.36609100 |
| B             | 0.28082700  | -1.16908500 | 0.69641000  |
| B             | 1.89509800  | -2.07239400 | -0.83523600 |
| B             | 1.94396000  | -1.63984600 | 1.53119900  |
| B             | 1.30043600  | 0.65370200  | 1.92908600  |
| B             | 3.90580800  | -1.23726900 | 0.19347800  |
| B             | 3.61722300  | 0.08889200  | 1.55503600  |

|    |             |             |             |
|----|-------------|-------------|-------------|
| B  | 3.83549500  | 1.01816900  | -0.66034800 |
| B  | 2.23083300  | 1.93721400  | 0.88211700  |
| B  | 2.81488500  | -0.77178000 | -1.90234900 |
| B  | 2.16711700  | 1.50410800  | -1.47705400 |
| B  | 0.05736100  | 1.27948700  | -0.15541400 |
| B  | 0.50354400  | -0.20684200 | -1.48189500 |
| Cu | -1.84381500 | 0.93249800  | -0.18578200 |
| C  | -5.38041700 | -0.74542400 | 0.04455500  |
| O  | -6.10038300 | -1.67713100 | 0.03475200  |
| Cl | -3.59388500 | -0.92347200 | -0.13086300 |
| Cl | -5.86860400 | 0.92365800  | 0.22296200  |
